# Supplementary material
Source: PubMed Central journal article supplement (PMC7439968)
Supplement: mmc1.pdf [file mmc1.pdf]

*Supplementary Table 1. Social Distancing and Social Resources as Predictors of Mental Health Symptoms in Late March 2020 Showing Alternative, Stepwise Model Building*

| Predictor                       | Step 1 |         |         | Step 2 |          |         | Step 3 |          |         |
|---------------------------------|--------|---------|---------|--------|----------|---------|--------|----------|---------|
|                                 | b      | SE      | $\beta$ | b      | SE       | $\beta$ | b      | SE       | $\beta$ |
| <i>March Depression</i>         |        |         |         |        |          |         |        |          |         |
| Age                             | -.18   | .05     | -.17*** | -.18   | .04      | -.17*** | -.15   | .04      | -.15*** |
| Gender                          | 1.69   | 1.16    | .07     | 3.62   | .98      | .15***  | 3.59   | .96      | .15***  |
| Income                          | -1.30  | .34     | -.18*** | -.50   | .31      | -.07    | -.64   | .30      | -.09*   |
| Social support                  |        |         |         | -.47   | .04      | -.59*** | -.49   | .03      | -.61*** |
| Social network size             |        |         |         | .14    | .06      | .10*    | .08    | .06      | .06     |
| Stay-at-home status             |        |         |         |        |          |         | 3.21   | .97      | .13**   |
| Distancing behavior             |        |         |         |        |          |         | 6.12   | 1.83     | .14**   |
| Adjusted R <sup>2</sup>         |        | .052    |         |        | .342     |         |        | .374     |         |
| $\Delta F$ from previous step   |        | 8.93*** |         |        | 95.88*** |         |        | 11.92*** |         |
| <i>March GAD</i>                |        |         |         |        |          |         |        |          |         |
| Age                             | -.09   | .02     | -.20*** | -.10   | .02      | -.20*** | -.08   | .02      | -.18*** |
| Gender                          | 1.56   | .54     | .14**   | 2.16   | .50      | .20***  | 2.14   | .50      | .20***  |
| Income                          | -.27   | .16     | -.08    | -.10   | .16      | -.03    | -.16   | .16      | -.05    |
| Social support                  |        |         |         | -.15   | .02      | -.40*** | -.15   | .02      | -.42*** |
| Social network size             |        |         |         | .08    | .03      | .13*    | .06    | .03      | .09     |
| Stay-at-home status             |        |         |         |        |          |         | 1.48   | .50      | .13**   |
| Distancing behavior             |        |         |         |        |          |         | 2.72   | .95      | .14**   |
| Adjusted R <sup>2</sup>         |        | .042    |         |        | .168     |         |        | .199     |         |
| $\Delta F$ from previous step   |        | 7.39*** |         |        | 33.71*** |         |        | 9.07***  |         |
| <i>March Intrusive Thoughts</i> |        |         |         |        |          |         |        |          |         |
| Age                             | -.04   | .02     | -.10*   | -.04   | .02      | -.11*   | -.03   | .02      | -.08    |
| Gender                          | 1.70   | .43     | .20***  | 1.96   | .42      | .22***  | 2.06   | .41      | .24***  |
| Income                          | -.06   | .12     | -.02    | -.15   | .13      | -.06    | -.21   | .13      | -.08    |
| Social support                  |        |         |         | -.06   | .02      | -.20*** | -.07   | .02      | -.23*** |
| Social network size             |        |         |         | .11    | .03      | .22***  | .07    | .03      | .14**   |
| Stay-at-home status             |        |         |         |        |          |         | .66    | .41      | .07     |
| Distancing behavior             |        |         |         |        |          |         | 3.89   | .78      | .25***  |
| Adjusted R <sup>2</sup>         |        | .031    |         |        | .081     |         |        | .134     |         |
| $\Delta F$ from previous step   |        | 5.71**  |         |        | 12.49*** |         |        | 14.24*** |         |
| <i>March Insomnia</i>           |        |         |         |        |          |         |        |          |         |
| Age                             | -.05   | .03     | -.09    | -.05   | .03      | -.09    | -.04   | .03      | -.08    |
| Gender                          | .49    | .60     | .04     | 1.14   | .57      | .09*    | 1.07   | .58      | .09     |
| Income                          | -.43   | .18     | -.12*   | -.20   | .18      | -.05    | -.23   | .18      | -.06    |
| Social support                  |        |         |         | -.16   | .02      | -.39*** | -.16   | .02      | -.39*** |
| Social network size             |        |         |         | .07    | .04      | .09     | .06    | .04      | .09     |
| Stay-at-home status             |        |         |         |        |          |         | 1.17   | .58      | .09*    |
| Distancing behavior             |        |         |         |        |          |         | .73    | 1.09     | .03     |
| Adjusted R <sup>2</sup>         |        | .013    |         |        | .131     |         |        | .137     |         |
| $\Delta F$ from previous step   |        | 2.89*   |         |        | 30.34*** |         |        | 2.37     |         |
| <i>March Acute Stress</i>       |        |         |         |        |          |         |        |          |         |
| Age                             | -.17   | .05     | -.17*** | -.17   | .04      | -.18*** | -.15   | .04      | -.16*** |
| Gender                          | 1.14   | 1.08    | .05     | 2.45   | 1.00     | .11*    | 2.32   | .99      | .11*    |
| Income                          | -.70   | .31     | -.11*   | -.34   | .31      | -.05    | -.47   | .31      | -.07    |
| Social support                  |        |         |         | -.32   | .04      | -.43*** | -.33   | .04      | -.45*** |
| Social network size             |        |         |         | .18    | .06      | .14**   | .15    | .07      | .12*    |
| Stay-at-home status             |        |         |         |        |          |         | 3.62   | .99      | .16***  |
| Distancing behavior             |        |         |         |        |          |         | 4.37   | 1.88     | .11*    |
| Adjusted R <sup>2</sup>         |        | .031    |         |        | .181     |         |        | .214     |         |
| $\Delta F$ from previous step   |        | 5.67**  |         |        | 40.32*** |         |        | 9.93***  |         |

Note. Gender is coded such that 1 = female. Stay-at-home status is coded such that 1 = yes. \* $p < .05$ , \*\* $p < .01$ , \*\*\* $p < .001$ . Degrees of freedom for  $F$  change are 3, 431 (Step 1); 2, 429 (Step 2); 2, 427 (Step 3).

Supplementary Table 2. Social Distancing and Social Resources as Predictors of Symptom Change from February to March 2020, Showing Alternative, Stepwise Model Building

| Predictor                     | Step 1 |           |         | Step 2 |      |         | Step 3 |      |         | Step 4 |         |         |
|-------------------------------|--------|-----------|---------|--------|------|---------|--------|------|---------|--------|---------|---------|
|                               | b      | SE        | $\beta$ | b      | SE   | $\beta$ | b      | SE   | $\beta$ | b      | SE      | $\beta$ |
| <i>March Depression</i>       |        |           |         |        |      |         |        |      |         |        |         |         |
| February Depression           | .75    | .05       | .82***  | .75    | .05  | .82***  | .72    | .07  | .78***  | .69    | .06     | .75***  |
| Age                           |        |           |         | -.07   | .06  | -.06    | -.08   | .06  | -.07    | -.05   | .06     | -.04    |
| Gender                        |        |           |         | 2.87   | 1.36 | .12*    | 3.00   | 1.36 | .13*    | 4.16   | 1.32    | .17**   |
| Income                        |        |           |         | .03    | .39  | <.01    | <.01   | .44  | <.01    | -.14   | .41     | -.02    |
| Social support                |        |           |         |        |      |         | -.07   | .06  | -.08    | -.13   | .06     | -.15*   |
| Social network size           |        |           |         |        |      |         | .06    | .08  | .05     | -.02   | .08     | -.01    |
| Stay-at-home status           |        |           |         |        |      |         |        |      |         | 1.10   | 1.25    | .04     |
| Distancing behavior           |        |           |         |        |      |         |        |      |         | 9.91   | 2.50    | .23***  |
| Adjusted R <sup>2</sup>       |        | .671      |         |        | .676 |         |        | .674 |         |        | .714    |         |
| $\Delta F$ from previous step |        | 239.88*** |         |        | 1.55 |         |        | 0.74 |         |        | 8.64*** |         |
| <i>March GAD</i>              |        |           |         |        |      |         |        |      |         |        |         |         |
| February GAD                  | .74    | .06       | .78***  | .74    | .06  | .77***  | .70    | .07  | .74***  | .68    | .06     | .72***  |
| Age                           |        |           |         | -.04   | .03  | -.08    | -.04   | .03  | -.09    | -.03   | .03     | -.07    |
| Gender                        |        |           |         | 1.12   | .66  | .11     | 1.21   | .66  | .11     | 1.72   | .65     | .16**   |
| Income                        |        |           |         | .12    | .19  | .04     | .09    | .21  | .03     | .03    | .20     | .01     |
| Social support                |        |           |         |        |      |         | -.04   | .03  | -.10    | -.06   | .03     | -.16*   |
| Social network size           |        |           |         |        |      |         | .05    | .04  | .09     | .01    | .04     | .03     |
| Stay-at-home status           |        |           |         |        |      |         |        |      |         | .49    | .62     | .04     |
| Distancing behavior           |        |           |         |        |      |         |        |      |         | 4.34   | 1.23    | .23**   |
| Adjusted R <sup>2</sup>       |        | .599      |         |        | .602 |         |        | .605 |         |        | .643    |         |
| $\Delta F$ from previous step |        | 175.64*** |         |        | 1.33 |         |        | 1.34 |         |        | 6.91**  |         |

Note. Gender is coded such that 1 = female. Stay-at-home status is coded such that 1 = yes. \* $p < .05$ , \*\* $p < .01$ , \*\*\* $p < .001$ . Degrees of freedom for  $F$  change are 1, 116 (Step 1); 3, 113 (Step 2); 2, 111 (Step 3); 2, 109 (Step 4).
